# Supplementary material for: Development of polyoxometalate-based Ag-H2biim inorganic–organic hybrid compounds functionalized for the acid electrocatalytic hydrogen evolution reaction
Source: Royal Society of Chemistry journal article supplement (doi:10.1039/d3dt02820h), 2023-01-01
Supplement: d3dt02820h1.pdf [file d3dt02820h1.pdf]

## Supporting Information

### **Development of polyoxometalate-based Ag-H<sub>2</sub>biim inorganic-organic hybrid compounds functionalized for acid electrocatalytic hydrogen evolution reaction**

Sifan Li,<sup>a,c</sup> Jiansheng Li,<sup>a,b,\*</sup> Haotian Zhu,<sup>a</sup> Liyuan Zhang,<sup>a</sup> Xiaojing Sang,<sup>a</sup> Zaiming Zhu,<sup>a</sup> Wansheng You<sup>a\*</sup> and Fuxiang Zhang<sup>b\*</sup>

<sup>a</sup> School of Chemistry and Chemical Engineering, Liaoning Normal University, Dalian 116029, Liaoning, China

<sup>b</sup> State Key Laboratory of Catalysis, iChEM, Dalian Institute of Chemical Physics, Chinese Academy of Sciences, Dalian National Laboratory for Clean Energy Dalian 116023, Liaoning, China

<sup>c</sup> Department of Biochemical Engineering, Chaoyang Techers College, Chaoyang 122000, Liaoning, China

## Contents

|                                                              |       |
|--------------------------------------------------------------|-------|
| 1. Synthesis of compounds <b>1</b> and <b>2</b> .....        | 1     |
| 2. Crystal data and refinement parameters.....               | 2     |
| 3. Crystal structure.....                                    | 3-4   |
| 4. Selected bond lengths and angles.....                     | 5-7   |
| 5. Characterization of compounds <b>1</b> and <b>2</b> ..... | 8-12  |
| 6. Electrocatalytic HER performance.....                     | 13-17 |
| 7. Characterizations toward HER analyses.....                | 18-24 |
| 8. References.....                                           | 25    |

## 1 Synthesis of compounds 1 and 2

### 1.1 Synthesis of $\{[(\text{Ag}_2(\text{H}_2\text{biim})(\text{H}_2\text{biimCOO}))_2\text{H}_2(\text{SiW}_{12}\text{O}_{40})]\cdot 4\text{H}_2\text{O}\}_n$ (1)

$\text{AgNO}_3$  (0.100 g, 0.59 mmol) and  $\text{H}_2\text{biim}$  (0.028 g, 0.20 mmol) were dissolved in 8 mL distilled water and stirred for 10 minutes at room temperature to form solution A.  $\text{H}_4[\alpha\text{-SiW}_{12}\text{O}_{40}]\cdot 12\text{H}_2\text{O}$  (0.190 g, 0.06 mmol) was dissolved in 7 mL distilled water to form solution B, which was added to solution A drop by drop. After stirring continuously for 2.5 h, the mixture was transferred into 20 mL Teflon-lined autoclave and heated at 160 °C for 4 days. The autoclave was cooled to 25 °C with the rate of 10 °C  $\text{h}^{-1}$ . Yellow block crystals of compound 1 were filtered, then washed with water and dried at room temperature (Yield: 56% based on W). Elemental analysis calculated for  $\text{C}_{26}\text{H}_{34}\text{Ag}_4\text{N}_{16}\text{O}_{48}\text{SiW}_{12}$  (4003.65): Si, 0.70%; W, 55.10%; Ag, 10.78%. Elements ratio found: Si, 0.75%; W, 55.20%; Ag, 10.80%. IR (KBr pellet,  $\text{cm}^{-1}$ ): 3565 (br), 3139 (m), 1714 (w), 1622 (m), 1544 (w), 1514 (m), 1377 (m), 1244 (m), 1114 (m), 1018 (m), 972 (s), 923 (s), 802 (s).

### 1.2 Synthesis of $\{\text{K}_2[(\text{Ag}_2(\text{H}_2\text{biim})_2)_2(\text{P}_2\text{W}_{18}\text{O}_{62})]\cdot 2\text{H}_2\text{O}\}_n$ (2).

The synthesis method of compound 2 is similar to that of compound 1, except that  $\text{AgNO}_3$  (0.260 g, 0.15 mmol) and  $\text{H}_2\text{biim}$  (0.067 g, 0.50 mmol) were dissolved in solution A and  $\text{K}_6[\alpha\text{-P}_2\text{W}_{18}\text{O}_{62}]\cdot 14\text{H}_2\text{O}$  (0.400 g, 0.08 mmol) was dissolved in solution B. Red hexagonal crystal of compound 2 were filtered, then washed with water and dried at room temperature (Yield: 49% based on W). Elemental analysis calculated for  $\text{C}_{24}\text{H}_{28}\text{Ag}_4\text{K}_2\text{N}_{16}\text{O}_{64}\text{P}_2\text{W}_{18}$  (5441.51): K, 1.43%; P, 1.14%; W, 60.78%; Ag, 7.92 %. Elements ratio found: K, 1.42%; P, 1.15%; W, 60.80%; Ag, 7.90%. IR (KBr pellet,  $\text{cm}^{-1}$ ): 3455 (br), 3244 (m), 3138 (w), 1620 (m), 1536 (m), 1418 (m), 1336 (w), 1292 (w), 1222 (w), 1088 (s), 950 (s), 901 (s), 801 (s).

### 1.3 Single Crystal X-ray Crystallography.

Single-crystal X-ray data of compounds 1 and 2 were collected at room temperature and corrected by LP factor and empirical absorption. The coordinates of all non-hydrogen atoms were solved by direct methods and refined by full-matrix least-squares. The hydrogen atoms were placed on the calculated positions. All calculations were completed by SHELXTL-2014 program.<sup>1</sup>

## 2. Crystal data and refinement parameters

**Table S1.** Crystal data and structure refinements for compounds **1** and **2**

| Compound                                                       | <b>1</b>                                                                                          | <b>2</b>                                                                                                                      |
|----------------------------------------------------------------|---------------------------------------------------------------------------------------------------|-------------------------------------------------------------------------------------------------------------------------------|
| Formula                                                        | C <sub>26</sub> H <sub>32</sub> Ag <sub>4</sub> N <sub>16</sub> O <sub>48</sub> SiW <sub>12</sub> | C <sub>24</sub> H <sub>28</sub> Ag <sub>4</sub> K <sub>2</sub> N <sub>16</sub> O <sub>64</sub> P <sub>2</sub> W <sub>18</sub> |
| Formula weight                                                 | 4002.44                                                                                           | 5441.51                                                                                                                       |
| T/K                                                            | 296(2)                                                                                            | 296(2)                                                                                                                        |
| Crystal system                                                 | Monoclinic                                                                                        | Orthorhombic                                                                                                                  |
| Space group                                                    | <i>P2<sub>1/n</sub></i>                                                                           | <i>Cmcm</i>                                                                                                                   |
| <i>a</i> /Å                                                    | 14.113(7)                                                                                         | 21.5725(10)                                                                                                                   |
| <i>b</i> /Å                                                    | 15.931(8)                                                                                         | 11.9328(5)                                                                                                                    |
| <i>c</i> /Å                                                    | 15.581(8)                                                                                         | 32.2060(15)                                                                                                                   |
| <i>α</i> /°                                                    | 90.00                                                                                             | 90.00                                                                                                                         |
| <i>β</i> /°                                                    | 94.238(7)                                                                                         | 90.00                                                                                                                         |
| <i>γ</i> /°                                                    | 90.00                                                                                             | 90.00                                                                                                                         |
| <i>V</i> /nm <sup>3</sup>                                      | 3.494(3)                                                                                          | 8.2905(6)                                                                                                                     |
| <i>Z</i>                                                       | 2                                                                                                 | 4                                                                                                                             |
| <i>μ</i> /mm <sup>-1</sup>                                     | 20.881                                                                                            | 26.027                                                                                                                        |
| <i>F</i> (000)                                                 | 3548                                                                                              | 9536                                                                                                                          |
| Total reflections                                              | 18177                                                                                             | 19109                                                                                                                         |
| <i>R</i> <sub>int</sub>                                        | 0.0450                                                                                            | 0.0544                                                                                                                        |
| GOF                                                            | 1.068                                                                                             | 1.098                                                                                                                         |
| <i>R</i> <sub>1</sub> [ <i>I</i> >2σ( <i>I</i> )] <sup>a</sup> | 0.0434                                                                                            | 0.0638                                                                                                                        |
| <i>wR</i> <sub>2</sub> (all data) <sup>b</sup>                 | 0.1051                                                                                            | 0.1922                                                                                                                        |

<sup>a</sup> $R_1 = \sum ||F_o| - |F_c|| / \sum |F_o|$ , <sup>b</sup> $wR_2 = \sum [w(F_o^2 - F_c^2)^2] / \sum [w(F_o^2)]^{1/2}$

### 3. Crystal structure

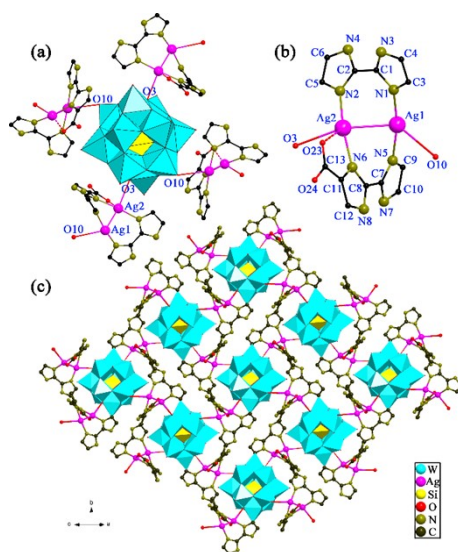

**Fig. S1** (a) The tetra-supported polyoxoanion structure in **1** and (b) the  $[\text{Ag}_2(\text{H}_2\text{biim})_2\text{COO}]^+$  complex unit in **1** and (c) the infinite 2-D layer framework of **1**.

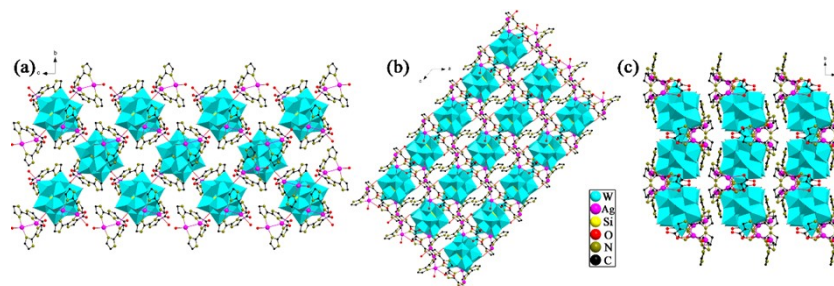

**Fig. S2** Polyhedral and ball-and-stick representation of 3D structure of compound **1** packing arrangement along a (a), b (b), and c (c) axes, respectively.

In compound **1**, each Keggin-type polyoxoanion acts as a tetradentate ligand that coordinates with four Ag(I) ions via two terminal oxygen atoms (O10, O10') and two bridging oxygen atoms (O3, O3') to form a tetra-supported structure (Fig. S1a). This multi-supported structure may play a key role in stabilizing the compound. In **1**, there are two crystallographic independent Ag(I) centers, i.e. Ag1 and Ag2 ( Fig. S1b). It is shown that in  $[\text{Ag}_2(\text{H}_2\text{biim})_2\text{COO}]^+$ , each Ag1 center adopts four-coordination mode, which coordinates with Ag2 and two nitrogen atoms (N1, N5) from two different  $\text{H}_2\text{biim}$  ligands and one oxygen atom (O10) from  $\text{SiW}_{12}$ . For Ag1, the bond lengths of Ag1–Ag2, Ag1–N1, Ag1–N5 and Ag1–O10 are 2.852(3) Å, 2.118(14) Å, 2.143(14) Å and 2.636(2) Å, respectively (Table S2). Ag2 adopts five-coordination mode, which coordinates with Ag1, two nitrogen atoms (N2, N6) from two different  $\text{H}_2\text{biim}$  ligands, one oxygen atom (O3) from  $\text{SiW}_{12}$  and one oxygen atom (O23) from the COO group. The bond lengths of Ag2–N2, Ag2–N6, Ag2–O3 and Ag2–O23 are 2.115(14) Å, 2.16(2) Å, 2.623(2) Å and 2.7863(3) Å, respectively (Table S2). It is noted that a closed five-membered ring forms through connection of Ag2, N6, C11, C13 and O23 atoms.

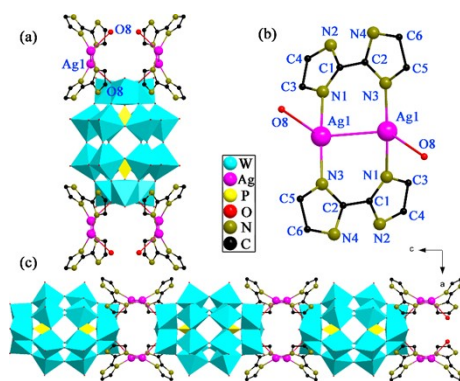

**Fig. S3** (a) The tetra-supported polyoxoanion structure in **2** and (b) the  $[Ag_2(H_2biim)_2]^{2+}$  complex unit in **2** and (c) the infinite 1-D chain of **2**.

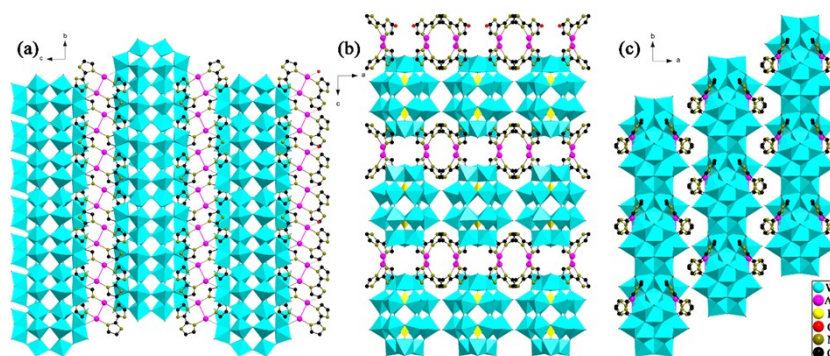

**Fig. S4** Polyhedral and ball-and-stick representation of 3D structure of compound **2** packing arrangement along a (a), b (b), and c (c) axes, respectively.

In **2**,  $P_2W_{18}$  acts as a tetradentate ligand which coordinates with four Ag(I) ions via two bridging oxygen atoms (O8, O8') to form a tetra-supported structure ( Fig. S3a). There is one crystallographic independent Ag1 center ( Fig. S3b). In  $[Ag_2(H_2biim)_2]^{2+}$ , each Ag1 coordinates with the other Ag1, two nitrogen atoms (N1, N3) from different  $H_2biim$  ligands and one oxygen atom (O8) from  $P_2W_{18}$  unit, with the bond length of Ag1–Ag1, Ag1–N1, Ag1–N3 and Ag1–O8 of 2.858(3) Å, 2.130(2) Å, 2.11(3) Å and 2.837(2) Å, respectively. The W–O distances are in the range of 1.684(12) Å–2.432(14) Å (Table S4).

#### 4. Selected bond lengths and angles

**Table S2** Selected bond lengths (Å) and bond angles (°) of compound **1**

| Bond          | Length(Å)  | Bond       | Length(Å) | Bond        | Length(Å) |
|---------------|------------|------------|-----------|-------------|-----------|
| Ag1–N5        | 2.143(14)  | Si1–O6     | 1.667(9)  | N5–C9       | 1.36(2)   |
| Ag1–N1        | 2.118(14)  | Si1–O6#1   | 1.667(9)  | N6–C11      | 1.369(18) |
| Ag1–Ag2       | 2.852(3)   | O2A–O2     | 0.83(2)   | N6–C8       | 1.30(2)   |
| Ag2–N2        | 2.115 (14) | O2– O13#1  | 1.81(3)   | N7–C7       | 1.34(2)   |
| Ag2–N6        | 2.16(2)    | O23–C13    | 1.231(19) | N7–C10      | 1.347(19) |
| Ag2–O23       | 2.7863(3)  | O24–C13    | 1.217(17) | N8–C12      | 1.33(2)   |
| Ag2–O3        | 2.623(2)   | N1–C1      | 1.35(2)   | N8–C8       | 1.40(2)   |
| Ag1–O10       | 2.636(2)   | N1–C3      | 1.35(2)   | C1–C2       | 1.42(2)   |
| Si1–O5#1      | 1.506(19)  | N2–C2      | 1.351(19) | C3–C4       | 1.33(2)   |
| Si1–O5        | 1.507(19)  | N2–C5      | 1.40(2)   | C5–C6       | 1.32(2)   |
| Si1–O20#1     | 1.55(3)    | N3–C1      | 1.36(2)   | C7–C8       | 1.42(2)   |
| Si1–O4#1      | 1.512(18)  | N3–C4      | 1.36(2)   | C9–C10      | 1.33(2)   |
| Si1–O4        | 1.512(18)  | N4–C2      | 1.35(2)   | C11–C13     | 1.36(2)   |
| Si1–O7        | 1.650(19)  | N4–C6      | 1.34(2)   | C11–C12     | 1.35(2)   |
| Si1–O7#1      | 1.650(19)  | N5–C7      | 1.326(19) |             |           |
| Bond          | Angle(°)   | Bond       | Angle(°)  | Bond        | Angle(°)  |
| O5#1–Si1–O5   | 180.0      | C3–N1–Ag1  | 125.8(13) | C3–C4–N3    | 107.1(17) |
| O4#1–Si1–O4   | 180.0      | C2–N2–C5   | 105.4(13) | C6–C5–N2    | 109.1(15) |
| O4#1–Si1–O7   | 114.0(10)  | C2–N2–Ag2  | 125.0(11) | O3–Ag2–Ag1  | 149.5(10) |
| O4–Si1–O7     | 66.0(10)   | C5–N2–Ag2  | 129.6(10) | O23–Ag2–O3  | 74.9(9)   |
| O4#1–Si1–O7#1 | 66.0(10)   | C1–N3–C4   | 108.0(16) | C13–O23–Ag2 | 108.3(10) |
| O4–Si1–O7#1   | 114.0(10)  | C6–N4–C2   | 109.2(14) | C5–C6–N4    | 107.8(16) |
| O7–Si1–O7#1   | 180.0(13)  | C7–N5–C9   | 106.4(14) | N5–C7–N7    | 109.9(14) |
| O5#1–Si1–O6   | 74.3(9)    | C7–N5–Ag1  | 128.4(11) | N5–C7–C8    | 126.4(16) |
| O5–Si1–O6     | 105.7(9)   | C9–N5–Ag1  | 125.1(11) | N7–C7–C8    | 123.7(15) |
| O5#1–Si1–O6#1 | 105.7(9)   | C8–N6–C11  | 105.2(14) | N6–C8–N8    | 110.8(14) |
| O5–Si1–O6#1   | 74.3(9)    | C8–N6–Ag2  | 129.5(10) | N6–C8–C7    | 127.7(15) |
| O6–Si1–O6#1   | 180.0      | C11–N6–Ag2 | 124.6(11) | N8–C8–C7    | 121.5(16) |
| N1–Ag1–N5     | 168.1(5)   | C7–N7–C10  | 107.0(14) | C10–C9–N5   | 108.6(15) |
| N1–Ag1–Ag2    | 81.7(4)    | C12–N8–C8  | 106.5(15) | C9–C10–N7   | 108.1(16) |
| N5–Ag1–Ag2    | 86.4(4)    | N1–C1–N3   | 107.7(14) | C12–C11–C13 | 127.1(15) |
| N2–Ag2–N6     | 167.9(5)   | N1–C1–C2   | 126.9(16) | C12–C11–N6  | 110.6(15) |
| N2–Ag2–Ag1    | 86.0(4)    | N3–C1–C2   | 125.3(17) | C13–C11–N6  | 122.1(16) |
| N6–Ag2–Ag1    | 84.2(3)    | N4–C2–N2   | 108.5(15) | N8–C12–C11  | 106.9(15) |
| Si1–O4–O7     | 60.8(9)    | N4–C2–C1   | 126.1(15) | O24–C13–O23 | 120.7(17) |
| C1–N1–C3      | 107.1(15)  | N2–C2–C1   | 125.4(15) | O24–C13–C11 | 120.3(17) |
| C1–N1–Ag1     | 127.1(11)  | C4–C3–N1   | 110.1(18) | O23–C13–C11 | 118.8(15) |

Symmetry transformations used to generate equivalent atoms: #1  $-x+1, -y+1, -z+1$

**Table S3** Hydrogen bonds for compound **1**

| <b>D–H...A</b>        | <b>d(D–H) (Å)</b> | <b>d(H...A) (Å)</b> | <b>d(D...A) (Å)</b> | <b>∠(DHA) (°)</b> |
|-----------------------|-------------------|---------------------|---------------------|-------------------|
| N(3)–H(3A)...O(4W) #2 | 0.86              | 1.83                | 2.68(5)             | 170.7             |
| N(4)–H(4A)...O(14A)#3 | 0.86              | 2.28                | 3.09(2)             | 156.2             |
| N(7)–H(7A)...O(5W) #4 | 0.86              | 1.93                | 2.74(2)             | 156.5             |
| N(8)–H(8A)...O(2W)    | 0.86              | 1.83                | 2.68(5)             | 170.7             |

Symmetry transformations used to generate equivalent atoms: #2  $-x+1, -y+2, -z+1$  #3  $x-1/2, -y+3/2, z+1/2$  #4  $-x+3/2, y-1/2, -z+3/2$



**Table S4** Selected bond lengths (Å) and bond angles (°) of compound **2**

| Bond       | Length(Å) | Bond       | Length(Å) | Bond      | Length(Å) |
|------------|-----------|------------|-----------|-----------|-----------|
| Ag1–N3     | 2.113(16) | W3–O6      | 1.909(11) | P1–O9     | 1.528(10) |
| Ag1–N1#1   | 2.144(17) | W3–O7      | 1.916(8)  | P1–O9#2   | 1.528(10) |
| W1–O1      | 1.718(11) | W3–O8      | 1.930(11) | P1–O14    | 1.534(16) |
| W1–O3      | 1.900(12) | W3–O14     | 2.400(10) | P1–O10    | 1.547(16) |
| W1–O16     | 1.903(10) | W4–O17     | 1.719(11) | N1–C1     | 1.28(2)   |
| W1–O2      | 1.905(2)  | W4–O16     | 1.898(10) | N1–C3     | 1.37(3)   |
| W1–O6      | 1.913(12) | W4–O20     | 1.900(2)  | N2–C1     | 1.33(2)   |
| W1–O9      | 2.357(9)  | W4–O19     | 1.911(7)  | N2–C4     | 1.37(3)   |
| W2–O5      | 1.689(17) | W4–O18     | 1.919(11) | N3–C2     | 1.33(2)   |
| W2–O4#2    | 1.919(11) | W4–O10     | 2.346(11) | N3–C5     | 1.36(3)   |
| W2–O4      | 1.919(11) | W5–O13     | 1.726(12) | N4–C6     | 1.33(3)   |
| W2–O8      | 1.922(11) | W5–O11     | 1.896(4)  | N4–C2     | 1.40(3)   |
| W2–O8#2    | 1.922(11) | W5–O12     | 1.900(2)  | C1–C2     | 1.45(3)   |
| W2–O14     | 2.432(14) | W5–O4      | 1.901(12) | C3–C4     | 1.30(3)   |
| W3–O15     | 1.684(12) | W5–O3      | 1.901(11) | C5–C6     | 1.33(3)   |
| W3–O18     | 1.907(12) | W5–O9      | 2.378(10) |           |           |
| Bond       | Angle(°)  | Bond       | Angle(°)  | Bond      | Angle(°)  |
| N3–Ag1–N14 | 168.4(7)  | O18–W3–O6  | 85.1(5)   | C1–N2–C4  | 106.3(16) |
| O1–W1–O9   | 173.6(5)  | O17–W4–O10 | 173.5(5)  | C2–N3–C5  | 107.4(16) |
| O2–W1–O6   | 163.9(5)  | O20–W4–O18 | 163.2(5)  | C2–N3–Ag1 | 126.5(13) |
| O16–W1–O2  | 87.0(5)   | O19–W4–O10 | 73.3(5)   | C6–N4–C2  | 106.9(19) |
| O3–W1–O9   | 73.1(4)   | O16–W4–O20 | 86.6(5)   | N1–C1–N2  | 109.4(16) |
| O5–W2–O14  | 172.2(7)  | O13–W5–O9  | 173.1(5)  | N2–C1–C2  | 122.2(17) |
| O4#2–W2–O8 | 155.9(5)  | O12–W5–O4  | 163.6(5)  | N3–C2–N4  | 107.9(17) |
| O82–W2–O14 | 73.2(4)   | O3–W5–O9   | 72.6(4)   | N4–C2–C1  | 124.5(17) |
| O4#2–W2–O4 | 84.7(7)   | O11–W5–O12 | 87.1(6)   | C4–C3–N1  | 107(2)    |
| O15–W3–O14 | 172.3(5)  | O9–P1–O9#2 | 112.5(8)  | C3–C4–N2  | 108.0(19) |
| O18–W3–O8  | 155.9(5)  | O14–P1–O10 | 106.3(8)  | C6–C5–N3  | 109(2)    |
| O7–W3–O14  | 73.2(5)   | C1–N1–C3   | 108.7(18) | N4–C6–C5  | 109(2)    |

Symmetry transformations used to generate equivalent atoms: #1+x, 1–y, –z; #2 1–x, +y, +z

**Table S5** Hydrogen bonds for compound **2**

| D–H...A        | d(D–H) (Å) | d(H...A) (Å) | d(D...A) (Å) | <(DHA) (°) |
|----------------|------------|--------------|--------------|------------|
| N2–H2A...O1#1  | 0.86       | 2.03         | 2.85(2)      | 159.4      |
| N4–H4A...O13   | 0.86       | 2.13         | 2.86(2)      | 142.3      |
| N4–H4A...O17#2 | 0.86       | 2.44         | 3.12(2)      | 135.4      |

Symmetry transformations used to generate equivalent atoms: #1 1/2–x, 1/2+y, +z; #2 +x, 1+y, +z

## 5. Characterization of compounds 1 and 2

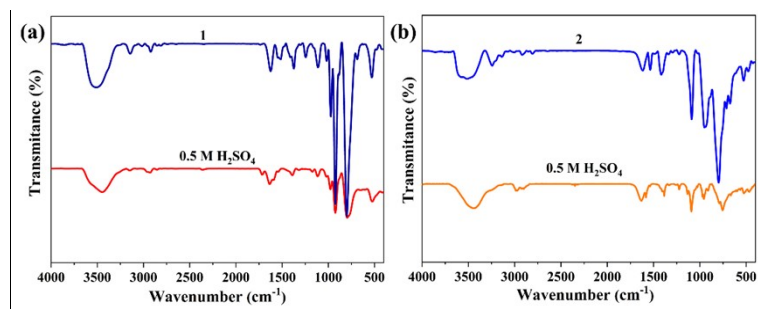

**Fig. S5** FTIR spectra of compounds (a) **1** and (b) **2** before and after immersing in 0.5 M H<sub>2</sub>SO<sub>4</sub> for 10 h.

The characteristic bands in the range of 713–1088 cm<sup>-1</sup> are attributed to  $\nu(W-O_b-W)/\nu(W-O_c-W)/\nu(W-O_d)/\nu(Si-O_c)/\nu(P-O_a)$  of the polyoxoanions ( $O_b$  = bridged oxygen of two octahedra sharing a corner,  $O_c$  = bridged oxygen of two octahedra and  $O_d$  = terminal oxygen).<sup>2,3</sup> The bands in the range of 1114–3244 cm<sup>-1</sup> are attributed to  $\nu(C-N)/\nu(C=C)/\nu(C=N)/\nu(N-H)/\nu(C-H)$  of H<sub>2</sub>biim, and the specific attributions are shown in Table S6.

**Table S6** FTIR peak assignments of compounds **1** and **2**

| Compound 1 |                     | Compound 2 |                     |
|------------|---------------------|------------|---------------------|
| 802        | W-O <sub>c</sub> -W | 801        | W-O <sub>c</sub> -W |
| 923        | W-O <sub>b</sub> -W | 901        | W-O <sub>b</sub> -W |
| 972        | Si-O <sub>c</sub>   | 950        | W-O <sub>d</sub>    |
| 1018       | W-O <sub>d</sub>    | 1088       | P-O <sub>c</sub>    |
| 1114       | C-N                 | 1222       | C-N                 |
| 1244       | C-N                 | 1292       | C-N                 |
| 1377       | C-N                 | 1336       | C-N                 |
| 1514       | C=C                 | 1418       | C=C                 |
| 1544       | C=C                 | 1536       | C=C                 |
| 1622       | C=N                 | 1620       | C=N                 |
| 1714       | C=O                 | 3138       | N-H                 |
| 3139       | N-H                 | 3244       | C-H                 |
| 3565       | O-H                 | 3455       | O-H                 |

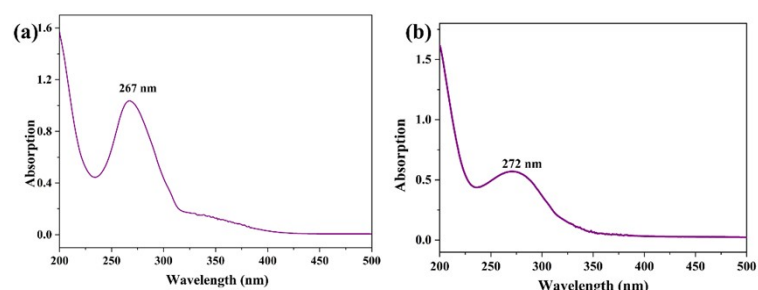

**Fig. S6** UV-vis absorption spectra of compounds (a) **1** and (b) **2**.

The UV-vis absorption spectra of **1** and **2** ( Fig. S6) shows good absorption peaks at 267 nm and 272 nm, respectively, which are ascribed to the  $O_{b,c} \rightarrow W$  charge transfer.<sup>4</sup>

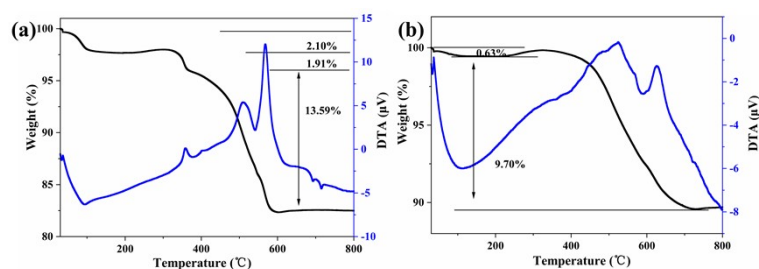

**Fig. S7** TG curves for compounds (a) **1** and (b) **2**.

The thermal stability of **1** and **2** were investigated under a  $N_2$  atmosphere from 0 to 800 °C, and the TG curves are provided in Fig. S7. For **1**, the weight loss of 2.10% (calcd 1.81%) in the range of 25–100 °C release was attributed to the crystal water molecules. In the range of 100–360 °C, the weight loss of 1.91% (calcd 2.20%) was assigned to decomposition of organic component of the COO group. The weight loss of 13.59 % (calcd 13.39 %) at 360–590 °C corresponds to the decomposition of  $H_2biim$ . The whole weight loss (17.60 %) is in good agreement with the calculated value (17.39%). For **2**, the first weight loss of 0.63 % (calcd 0.67 %) below 100 °C were assigned to the removal of  $H_2O$ , and the second continuous weight losses of 9.70 % (calcd 9.92%) at 100–720 °C may be the decomposition of  $H_2biim$  ligands.

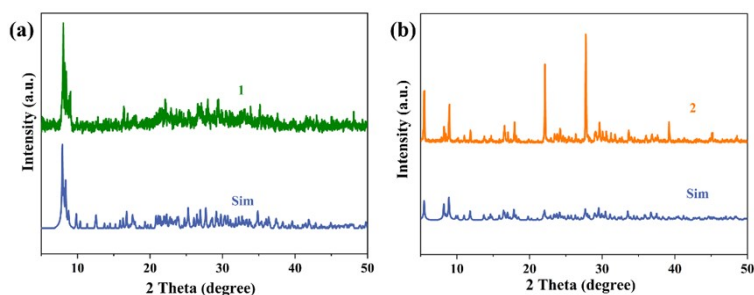

**Fig. S8** PXRD spectra of compounds (a) **1** and (b) **2**.

The simulated and experimental PXRD of **1** and **2** are shown in Fig. S8. The experimental diffraction peaks are consistent with the simulated patterns, indicating the phase purity of **1** and **2**. The difference in intensity may be due to the destruction of lattice waters during grinding, which affects the surface morphology of the powder samples.

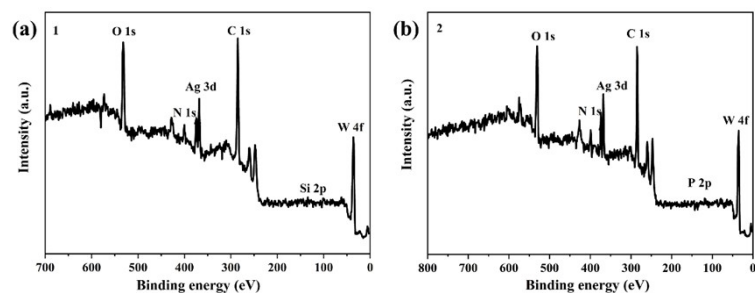

**Fig. S9** XPS survey spectra of compounds (a) **1** and (b) **2**.

XPS was performed to probe the structural and chemical states of the elements present in **1** and **2**. The XPS survey spectrum indicates the presence of Ag, Si, W, O, N, C for **1** and Ag, P, W, O, N, C for **2** ( Fig. S9).

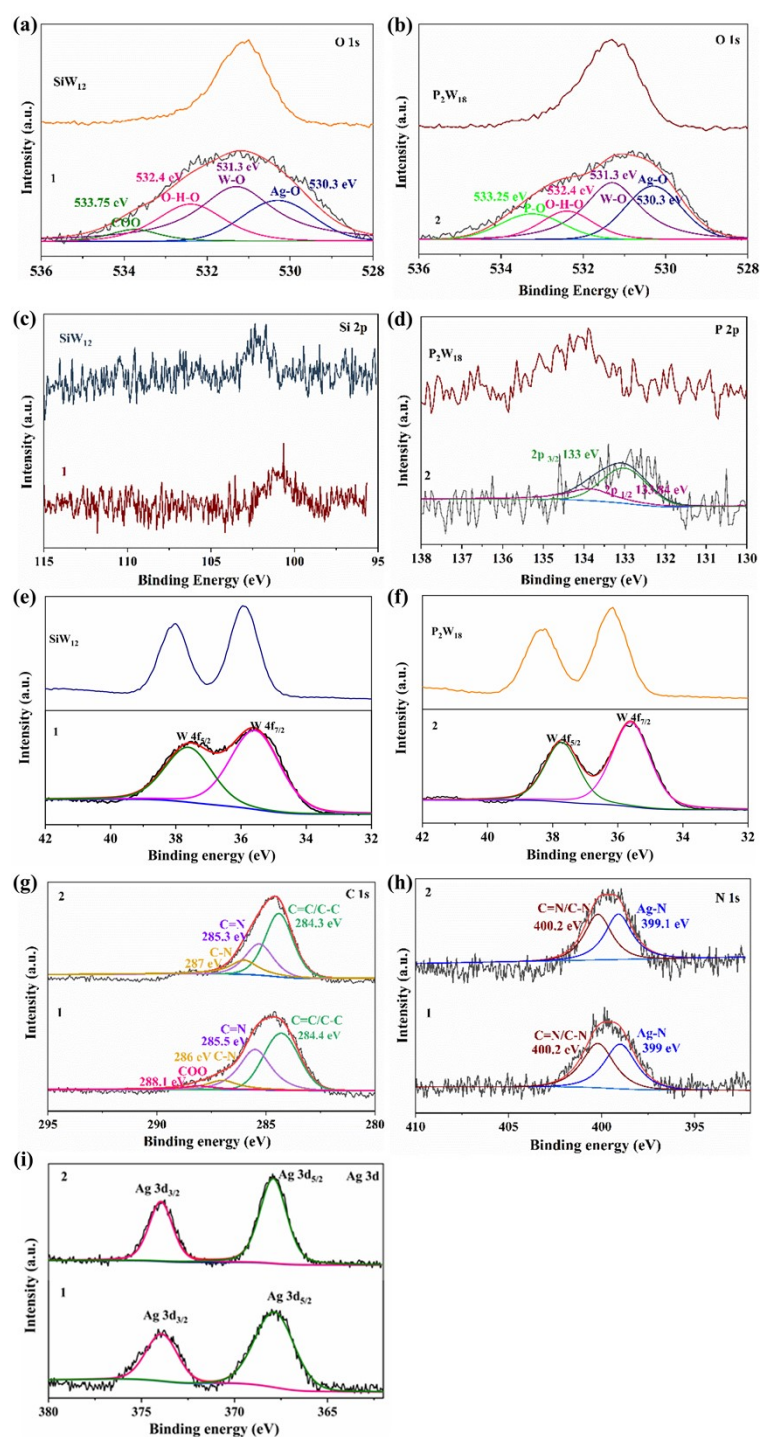

**Fig. S10** XPS spectra for (a,b) O 1s, (c) Si 2p, (d) P 2p, (e,f) W 4f, (g) C 1s, (h) N 1s and (i) Ag 3d of  $\text{SiW}_{12}$ ,  $\text{P}_2\text{W}_{18}$ , compounds **1** and **2**, respectively.

As shown in Figure S10, compared with  $\text{SiW}_{12}$  and  $\text{P}_2\text{W}_{18}$ , it is noted that the peak positions for Si/W/O in **1** and P/W/O in **2** have all shifted to lower binding energy region, which is maybe due

to the interaction between POMs ( $\text{SiW}_{12}$  and  $\text{P}_2\text{W}_{18}$ ) and  $\text{Ag-H}_2\text{biim}$ . In detail, the O 1s region indicates four distinct features assigned to Ag–O, W–O, COO and H–O–H bonds for **1**, Ag–O, W–O, P–O and H–O–H bonds for **2**, respectively ( Fig. S10a and b).<sup>5–7</sup> The Si 2p for **1** and P 2p for **2** regions are presented in Fig. S10c and d. The W 4f region can be deconvoluted into two signals related to W  $4f_{7/2}$  and W  $4f_{5/2}$  peaks referring to the W (VI) oxidation state ( Fig. S10e and f).<sup>8</sup> The C 1s region is fitted four peaks for **1**: C=C/C–C, C=N, C–N and COO bonds, three peaks for **2**: C=C/C–C, C=N, and C–N bonds ( Fig. S10g), respectively. All the N 1s region is fitted into two peaks assigned to Ag–N and C=N/C–N bonds, respectively ( Fig. S10h).<sup>9,10</sup> The typical peaks for Ag 3d at 367.9 and 373.9 eV are assigned to Ag  $3d_{5/2}$  and Ag  $3d_{3/2}$ , respectively, which are indicative of Ag (I) in **1** and **2** ( Fig. S10i).<sup>11,12</sup>

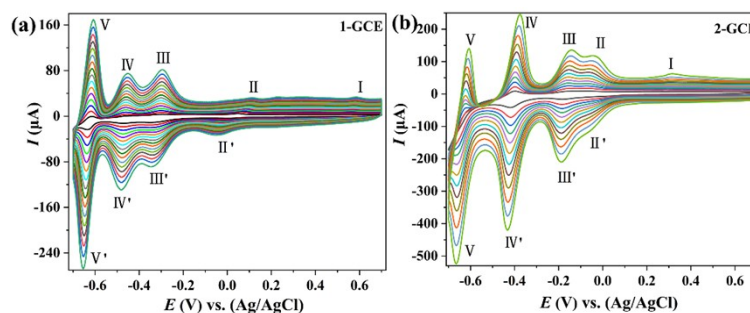

**Fig. S11** CV curves of (a) **1**-GCE and (b) **2**-GCE in 0.1 M  $\text{H}_2\text{SO}_4$  aqueous solution under scan rates from inner to outer: 25, 50, 75, 100, 125, 150, 175, 200, 225, 250, 275 and  $300 \text{ mV s}^{-1}$ .

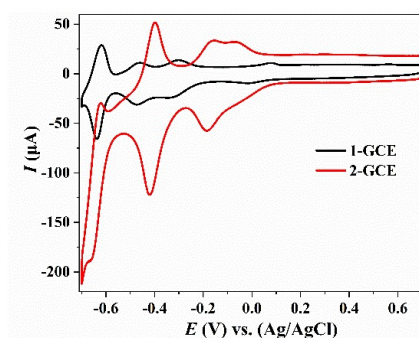

**Fig. S12** CV curves of **1**-GCE and **2**-GCE in 0.1 M  $\text{H}_2\text{SO}_4$  aqueous solution at  $100 \text{ mV s}^{-1}$ .

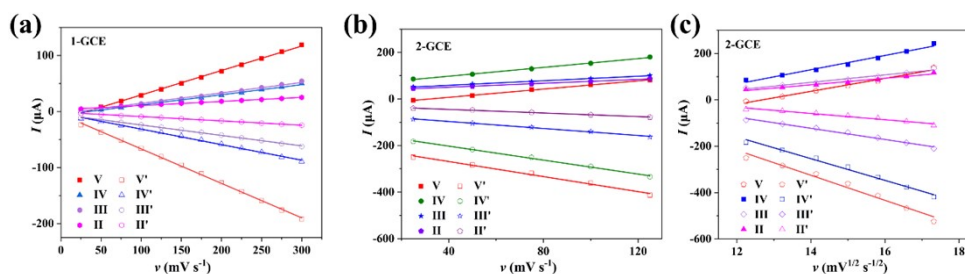

**Fig. S13** The linear fit plots of the anodic and cathodic peak currents against scan rate for (a) **1**-GCE, (b) **2**-GCE and (c) against square root of scan rate for **2**-GCE, respectively.

The CV curves contain three (**1**-GCE) and four (**2**-GCE) pairs of reversible redox peaks, with the corresponding mean peak potentials ( $E_{1/2} = (E_{pa} + E_{pc}) / 2$ ) at  $-0.312$  (III-III'),  $-0.466$  (IV-IV') and  $-0.63$  (V-V') V for **1**,  $-0.052$  (II-II'),  $-0.173$  (III-III'),  $-0.408$  (IV-IV') and  $-0.638$  V (V-V') for **2** (scan rate:  $100 \text{ mV s}^{-1}$ ). The redox peaks can be ascribed to the redox process of W centers in the polyanions and the processes involved are in good agreement with the previously published works.<sup>13,14</sup>

The redox peak II-II' ( $0.030 \text{ V}$ ) for **1** can be attributed to a Ag(I)/Ag(0) redox process. The other irreversible anodic peak I for **1** ( $0.562 \text{ V}$ ) and **2** ( $0.295 \text{ V}$ ) are assigned to the oxidation of the Ag(I).<sup>15</sup> In addition, the areas of the CV curve surrounding **1**-GCE and **2**-GCE at  $100 \text{ mV s}^{-1}$  are compared in Fig. S12. It can also be observed that the order of CV area is as **2**-GCE > **1**-GCE, indicating that **2** shows a larger capacitance than **1** at the same current density.<sup>16</sup> It is noted that **1**-GCE and **2**-GCE are stable, and the peak potentials change little with the increasing scan rates, which is especially useful for electrocatalytic studies. In plots of the redox peak currents of anode and cathode against scanning rates from  $25$  to  $300 \text{ mV s}^{-1}$ , for **1**-GCE, the peak currents are proportional to the scanning rates, indicating that the redox processes is surface-controlled ( Fig. S13a).<sup>17</sup> For **2**-GCE, when the scan rates are lower than  $150 \text{ mV s}^{-1}$ , the peak currents are proportional to the scan rates, which indicates that the redox process is surface-controlled ( Fig. S13b); however, when the scan rates are higher than  $150 \text{ mV s}^{-1}$ , the peak currents are proportional to the square root of the scan rate, which indicates that the redox process is diffusion-controlled ( Fig. S13c).<sup>15</sup>

## 6. Electrocatalytic HER performance

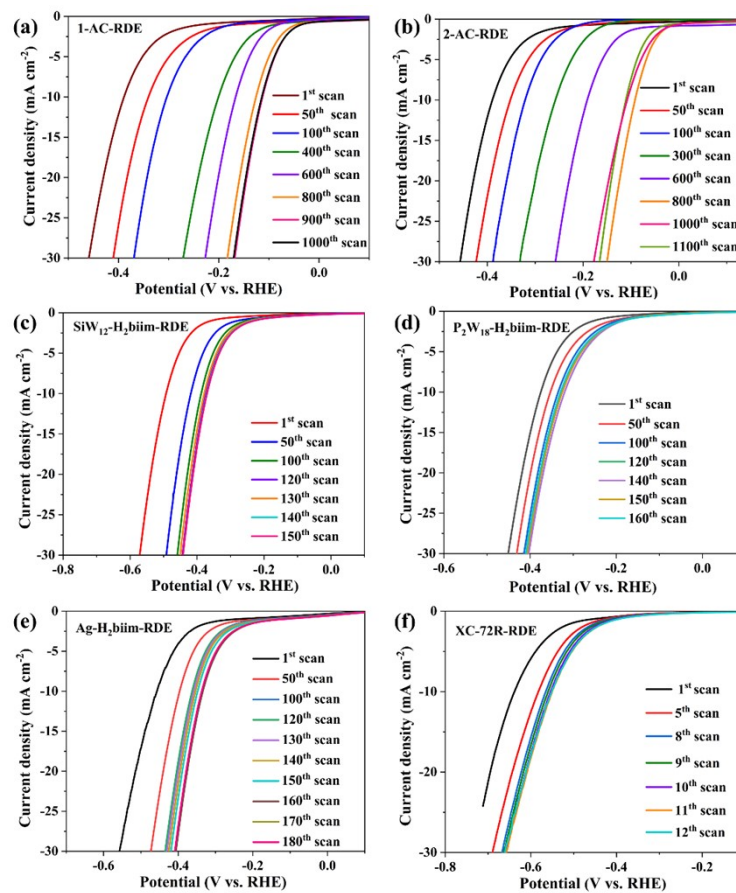

**Fig. S14** LSV curves of (a) 1-AC-RDE, (b) 2-AC-RDE, (c) SiW<sub>12</sub>-H<sub>2</sub>biim-RDE, (d) P<sub>2</sub>W<sub>18</sub>-H<sub>2</sub>biim-RDE, (e) Ag-H<sub>2</sub>biim-RDE and (f) XC-72R-RDE after different times of successive CV cycles in 0.5 M H<sub>2</sub>SO<sub>4</sub>, scan rate: 5 mV s<sup>-1</sup>.

**Table S7** Comparison of HER performance of **1-AC-RDE** and **2-AC-RDE** with other POMs-based HER electrocatalysts in acidic electrolyte

| Catalyst                                  | Loading<br>(mg cm <sup>-2</sup> ) | Electrode    | $\eta_{10}$<br>(mV) | Tafel slope<br>(mV dec <sup>-1</sup> ) | Reference |
|-------------------------------------------|-----------------------------------|--------------|---------------------|----------------------------------------|-----------|
| <b>1-AC-RDE</b>                           | 0.32                              | RDE          | 112                 | 77                                     | This work |
| <b>2-AC-RDE</b>                           | 0.32                              | RDE          | 91                  | 65                                     | This work |
| NENU-500                                  | 0.36                              | GCE          | 237                 | 96                                     | 18        |
| NENU-501                                  | 0.36                              | GCE          | 392                 | 137                                    | 18        |
| NiP <sub>2</sub> Mo <sub>5</sub>          | 0.28                              | GCE          | 255                 | 122                                    | 19        |
| S-NiP <sub>2</sub> Mo <sub>5</sub>        | 0.28                              | GCE          | 85                  | 46                                     | 19        |
| HUST-200                                  | 0.35                              | GCE          | 131                 | 51                                     | 20        |
| Cu <sub>2</sub> W <sub>6</sub>            | -                                 | GCE          | 146                 | 69                                     | 21        |
| 1-CP                                      | 0.13                              | Carbon paper | 417                 | 68                                     | 22        |
| NiMo <sub>6</sub> O <sub>24</sub> @Cu/TNA | 4 ± 0.2                           | GCE          | 215                 | 89                                     | 23        |
| Mn <sub>4</sub> V/CoSe <sub>2</sub> NBs   | 1.02                              | GCE          | 187                 | 55                                     | 24        |
| 1/CC                                      | 10                                | Carbon cloth | 164.2               | 246.2                                  | 2         |
| HUST-100                                  | 0.35                              | GCE          | 234                 | 82                                     | 25        |
| 1-CP                                      | 0.23                              | Carbon paper | 120                 | 112                                    | 26        |
| 1-CC                                      | -                                 | Carbon cloth | 480                 | 151                                    | 27        |
| P <sub>8</sub> W <sub>48</sub> /rGO       | 0.3                               | RDE          | 28                  | 38                                     | 28        |
| P <sub>2</sub> W <sub>18</sub> @rGF_ox    | 0.5                               | GCE          | 35                  | 37                                     | 29        |
| P <sub>5</sub> W <sub>30</sub> @rGF_ox    | 0.5                               | GCE          | 33                  | 33                                     | 29        |
| P <sub>8</sub> W <sub>48</sub> @rGF_ox    | 0.5                               | GCE          | 44                  | 41                                     | 29        |

Notes: overpotential  $\eta_{10}$  at the current density of 10 mA cm<sup>-2</sup>.



**Table S8** Comparison of HER performance of 1-AC-RDE and 2-AC-RDE with other Ag-based HER electrocatalysts in acidic electrolyte

| Catalyst                                           | Loading (mg cm <sup>-2</sup> ) | Electrode    | $\eta_{10}$ (mV) | Tafel slope (mV dec <sup>-1</sup> ) | Reference |
|----------------------------------------------------|--------------------------------|--------------|------------------|-------------------------------------|-----------|
| 1-AC-RDE                                           | 0.32                           | RDE          | 112              | 77                                  | This work |
| 2-AC-RDE                                           | 0.32                           | RDE          | 91               | 65                                  | This work |
| MoO <sub>3</sub> /Ag                               | –                              | GCE          | 145              | 43                                  | 30        |
| AgBr <sub>800</sub>                                | –                              | GCE          | 108              | 119                                 | 31        |
| Pristine Ag                                        | –                              | GCE          | –                | 98                                  | 17        |
| 1T-MoS <sub>2</sub> @Ag/Au NPs                     | –                              | GCE          | 201              | 53                                  | 32        |
| Pd <sub>68</sub> Ag <sub>32</sub>                  | 0.71                           | GCE          | 176              | 101.4                               | 32        |
| Pd <sub>43</sub> Ag <sub>21</sub> Pt <sub>36</sub> | 0.71                           | GCE          | 9                | 19.6                                | 33        |
| 8 wt% Ag/MoS <sub>2</sub>                          | ~2.1                           | RDE          | 230              | 109                                 | 34        |
| Ag foil                                            | 0.2                            | GCE          | 614              | 231                                 | 35        |
| Ag-200                                             | 0.2                            | GCE          | 233              | 82                                  | 35        |
| L-Ag NPs                                           | 0.2                            | GCE          | 32               | 31                                  | 35        |
| 20Ag@CN                                            | 9                              | ITO          | 213              | 250                                 | 36        |
| Hb/20Ag@CN                                         | 9                              | ITO          | 79               | 155                                 | 36        |
| P-Ag@NC                                            | 0.8                            | GCE          | 78               | 107                                 | 37        |
| Nanoporous Ag foam                                 | 0.245                          | Carbon fiber | 362              | 136                                 | 38        |

Notes: overpotential  $\eta_{10}$  at the current density of 10 mA cm<sup>-2</sup>.

**Table S9** Summary of HER performances of different electrocatalysts in 0.5 M H<sub>2</sub>SO<sub>4</sub>

| Catalyst                                                | $\eta_{10}$ (mV) | $\eta_{50}$ (mV) | Tafel slope (mV dec <sup>-1</sup> ) | $j_0$ (mA cm <sup>-2</sup> ) | R <sub>ct</sub> ( $\Omega$ ) |
|---------------------------------------------------------|------------------|------------------|-------------------------------------|------------------------------|------------------------------|
| 1-AC-RDE                                                | 112              | 206              | 77                                  | 0.3414                       | 5.72                         |
| 2-AC-RDE                                                | 91               | 192              | 65                                  | 0.4480                       | 5.11                         |
| Ag-H <sub>2</sub> biim-RDE                              | 334              | 456              | 127                                 | 0.0668                       | 74.52                        |
| SiW <sub>12</sub> -H <sub>2</sub> biim-RDE              | 530              | 677              | 147                                 | 0.0117                       | 50.26                        |
| P <sub>2</sub> W <sub>18</sub> -H <sub>2</sub> biim-RDE | 490              | 635              | 136                                 | 0.0359                       | 19.18                        |
| Pt/C                                                    | 51               | 121              | 37                                  | –                            | –                            |

Notes: overpotential  $\eta_{10}$  and  $\eta_{50}$  at the current density of 10 and 50 mA cm<sup>-2</sup>, respectively.

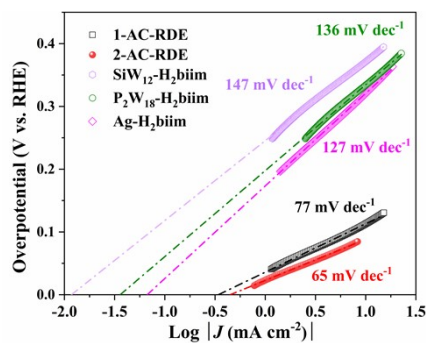

**Fig. S15** Exchange current density ( $j_0$ ) of different catalysts modified RDE in 0.5 M  $\text{H}_2\text{SO}_4$ .

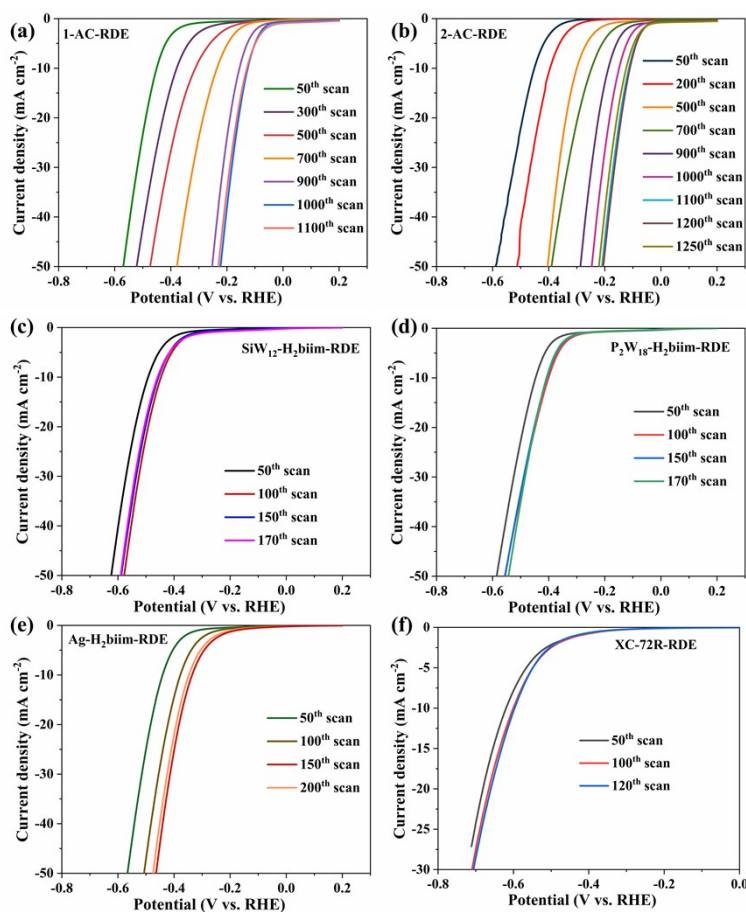

**Fig. S16** LSV curves of (a) 1-AC-RDE, (b) 2-AC-RDE, (c)  $\text{SiW}_{12}\text{-H}_2\text{biim-RDE}$ , (d)  $\text{P}_2\text{W}_{18}\text{-H}_2\text{biim-RDE}$ , (e)  $\text{Ag-H}_2\text{biim-RDE}$  and (f) XC-72R-RDE after different times of successive CV cycles using graphite rod instead of Pt wire as the counter electrode in 0.5 M  $\text{H}_2\text{SO}_4$ , scan rate:  $5 \text{ mV s}^{-1}$ .

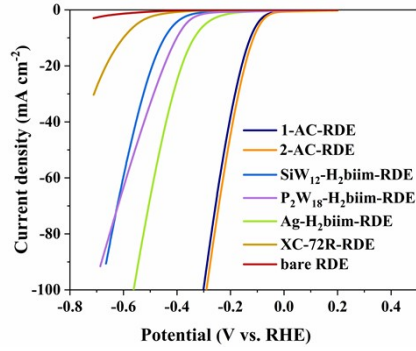

**Fig. S17** LSV curves of different catalysts modified RDE using graphite rod as counter electrode in 0.5 M H<sub>2</sub>SO<sub>4</sub>

**Table S10** Summary of HER performances of different electrocatalysts using graphite rod as counter electrode in 0.5 M H<sub>2</sub>SO<sub>4</sub>

| Catalyst                                                | $\eta_{10}$<br>(mV) | $\eta_{50}$<br>(mV) |
|---------------------------------------------------------|---------------------|---------------------|
| 1-AC-RDE                                                | 125                 | 223                 |
| 2-AC-RDE                                                | 114                 | 210                 |
| Ag-H <sub>2</sub> biim-RDE                              | 336                 | 464                 |
| SiW <sub>12</sub> -H <sub>2</sub> biim-RDE              | 446                 | 578                 |
| P <sub>2</sub> W <sub>18</sub> -H <sub>2</sub> biim-RDE | 401                 | 557                 |
| XC-72R                                                  | 599                 | -                   |
| Bare RDE                                                | -                   | -                   |

Notes: overpotential  $\eta_{10}$  and  $\eta_{50}$  at the current density of 10 and 50 mA cm<sup>-2</sup>, respectively

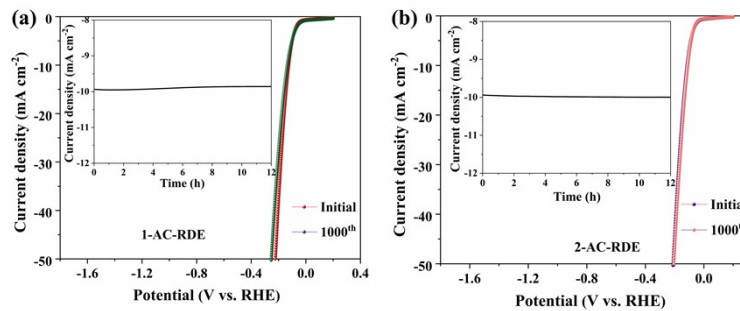

**Fig. S18** LSV curves of (a) 1-AC-RDE and (b) 2-AC-RDE before and after 1000 times of CV sweeps (inset: chronoamperometric curves) using graphite rod as counter electrode.

## 7. Characterizations toward HER analysis

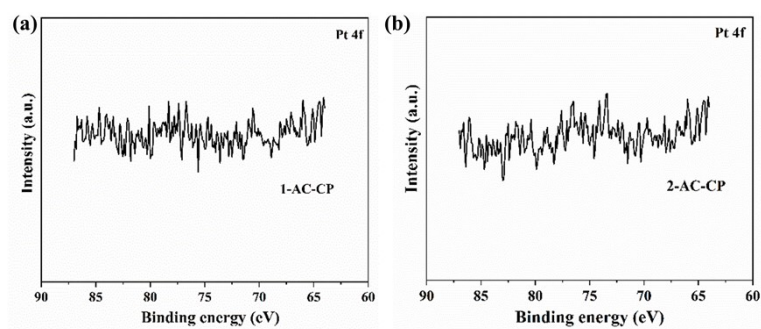

**Fig. S19** XPS spectra of **1-AC-CP** and **2-AC-CP** for Pt 4f.

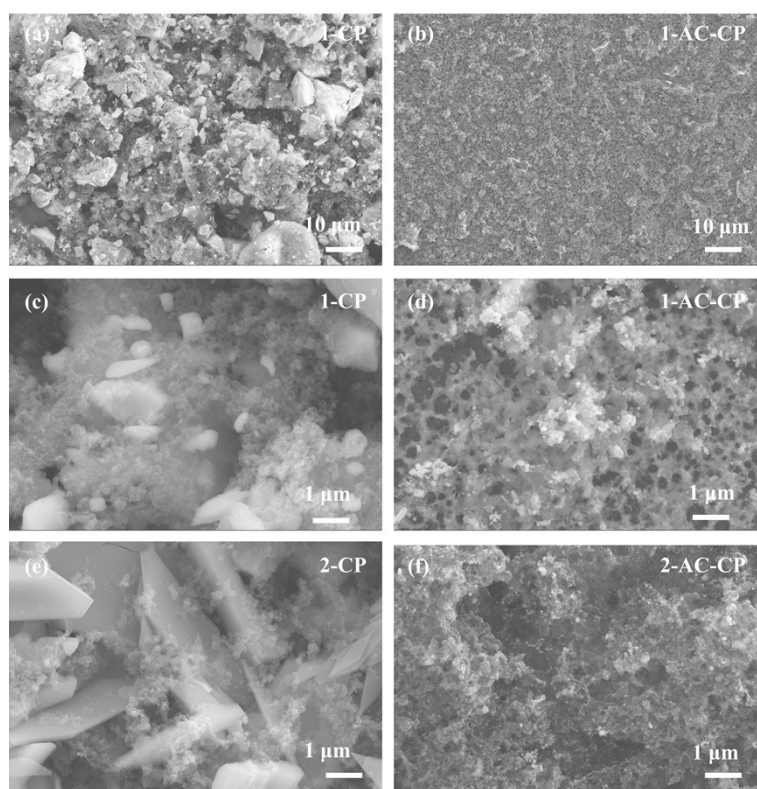

**Fig. S20** SEM image of (a, c) **1-CP**, (b, d) **1-AC-CP**, (e) **2-CP** and (f) **2-AC-CP**.

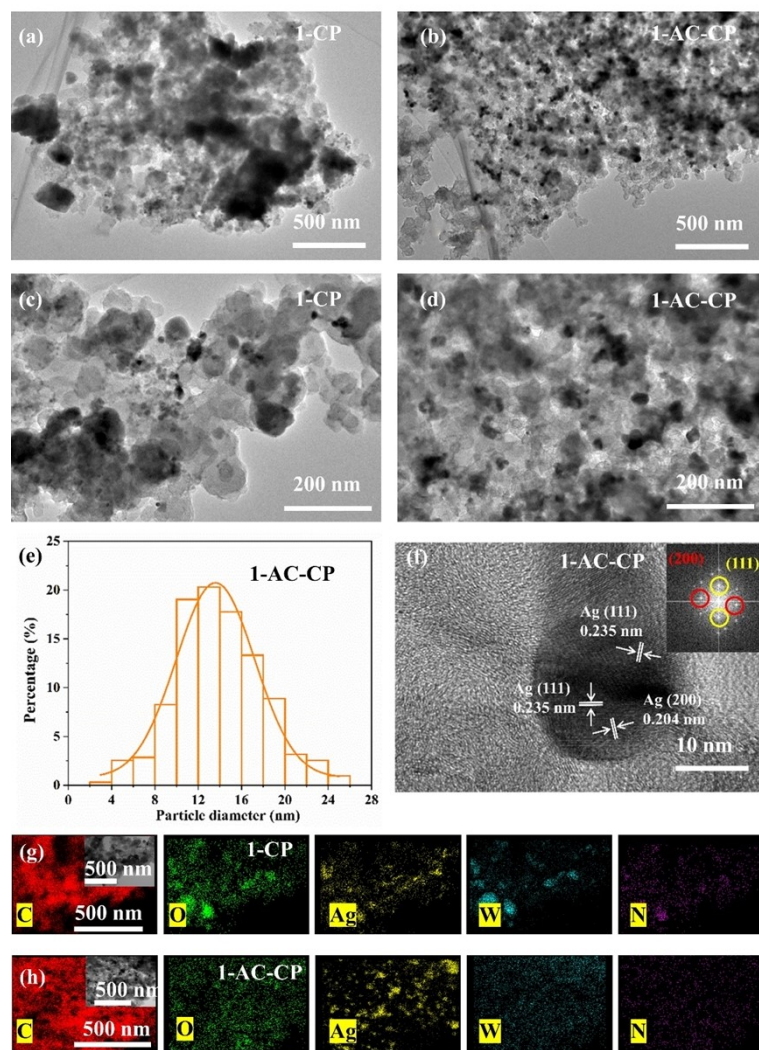

**Fig. S21** TEM images of (a, c) **1-CP** and (b, d) **1-AC-CP**, (e) particle size distribution of **1-AC-CP**, (f) HR-TEM image of **1-AC-CP** (inset is FFT image), elemental mappings of (g, h) C, O, Ag, W and N in **1-CP** and **1-AC-CP**, respectively.

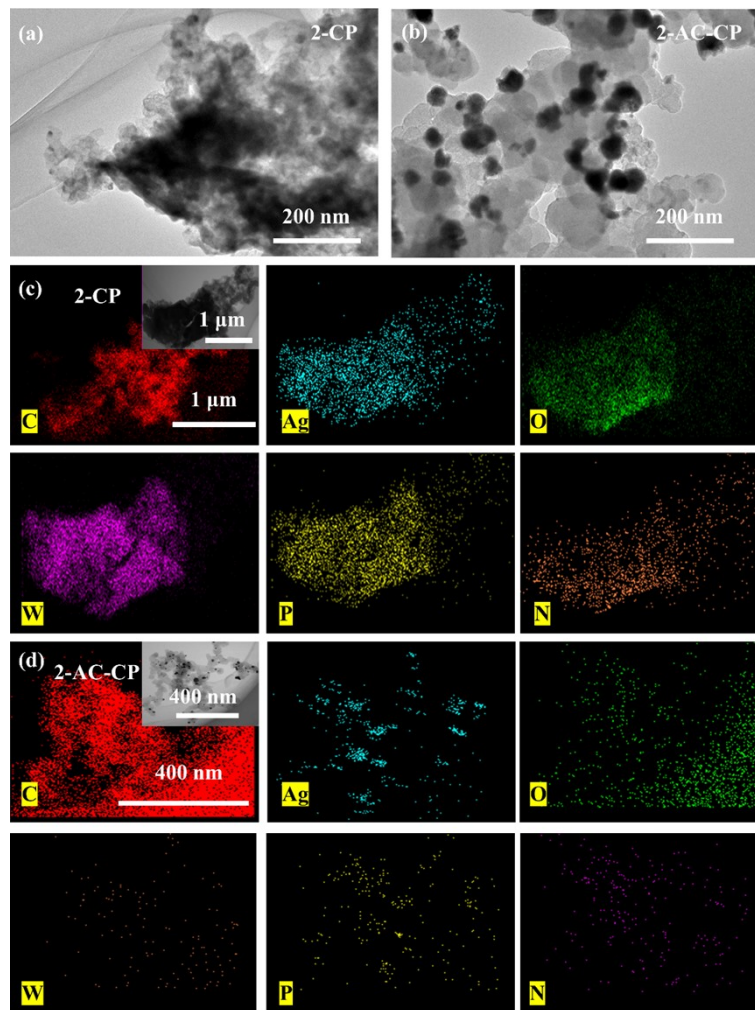

**Fig. S22** TEM images of (a) 2-CP and (b) 2-AC-CP, elemental mappings of (c, d) C, O, Ag, W and N in 2-CP and 2-AC-CP, respectively.

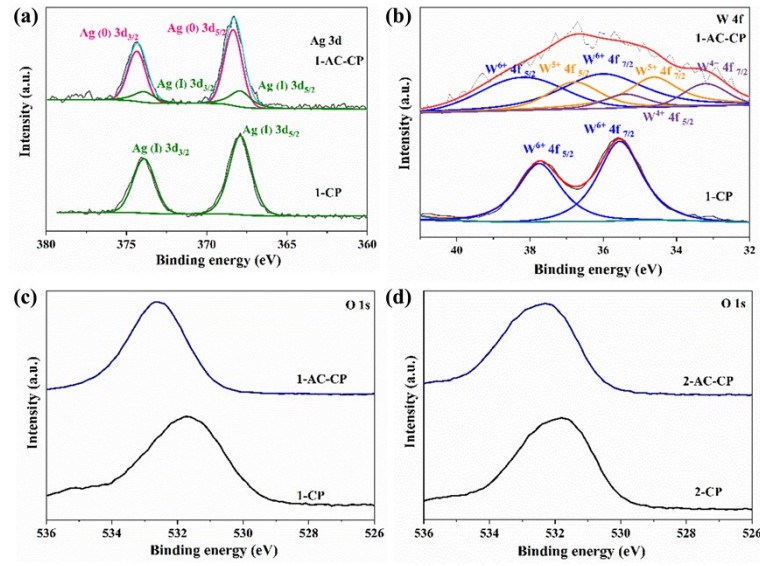

**Fig. S23** XPS spectra of 1-CP, 2-CP, 1-AC-CP and 2-AC-CP for (a) Ag 3d, (b) W 4f and (c-d) O 1s.

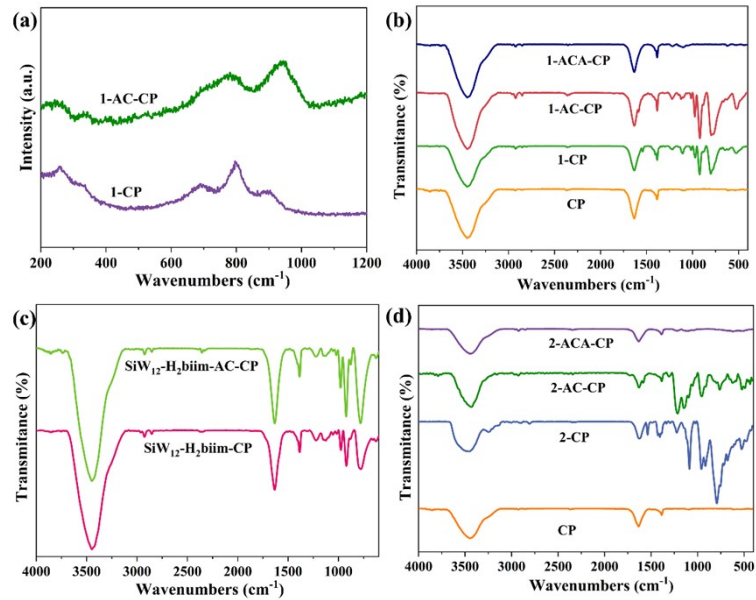

**Fig. S24** (a) Raman spectra of 1-CP and 1-AC-CP and (b) FTIR spectrum of the carbon paper, 1-CP, 1-AC-CP and 1-ACA-CP that represents 1-AC-CP was treated in 0.1 M KOH for 4h and (c) FTIR spectrum of the fresh and activated SiW<sub>12</sub>-H<sub>2</sub>biim-CP and (d) the carbon paper, 2-CP, 2-AC-CP and 2-ACA-CP that represents 2-AC-CP was treated in 0.1 M KOH for 4h.

**Table S11** Calculation of Ag and W percentage leached into electrolyte from 1-CP and 2-CP after the electrochemical restructuring based on ICP-OES data

| Electrode | Mass on the electrode before electrochemical restructuring (mg) |         | Mass in the electrolyte after electrochemical restructuring (mg) |         | Leaching percentage (%) |       |
|-----------|-----------------------------------------------------------------|---------|------------------------------------------------------------------|---------|-------------------------|-------|
|           | Ag                                                              | W       | Ag                                                               | W       | Ag                      | W     |
| 1-CP      | 0.04312                                                         | 0.22040 | 0.00031                                                          | 0.06064 | 0.72                    | 27.50 |
| 2-CP      | 0.03168                                                         | 0.24312 | 0.00033                                                          | 0.06490 | 1.04                    | 26.69 |

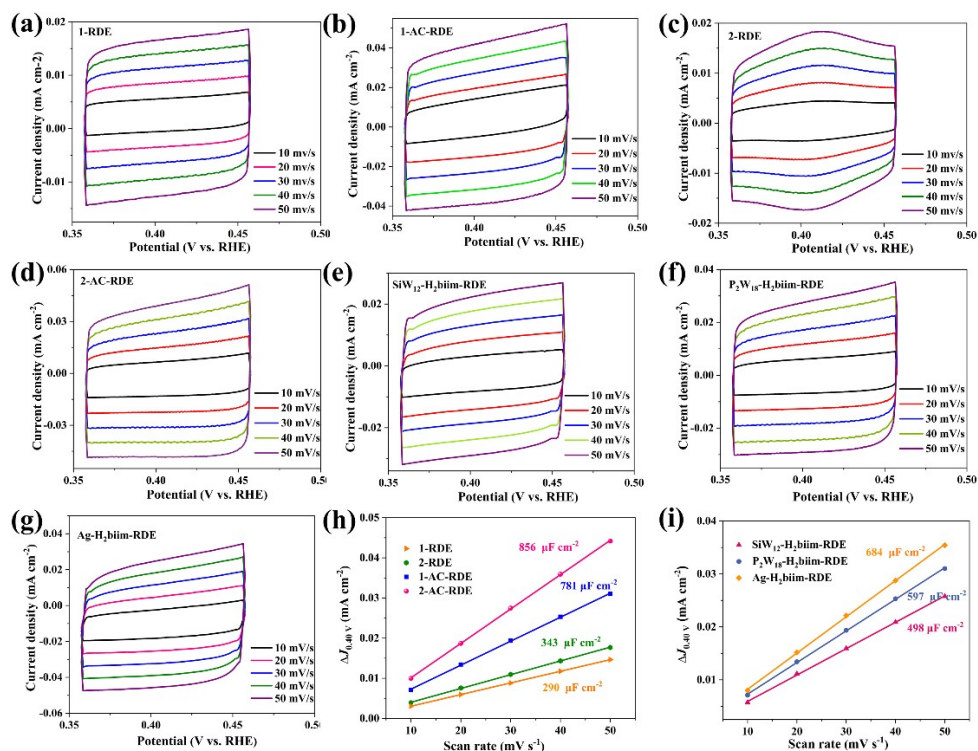

**Fig. S25** (a-g) CV curves at non-faradaic potentials of different catalysts modified RDE with scan rates from 10 to 50  $\text{mV s}^{-1}$  and (h, i) the capacitive current at 0.4 V (vs. RHE) as a function of scan rate for different catalysts modified RDE.



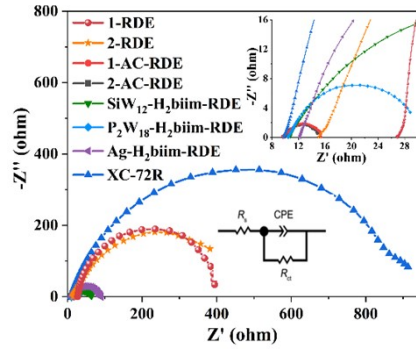

**Fig. S26** Nyquist plots of different catalysts modified RDE in 0.5 M  $\text{H}_2\text{SO}_4$ , (inset is the magnified images of low frequency region and the equivalent circuit used to fit Nyquist plots) .

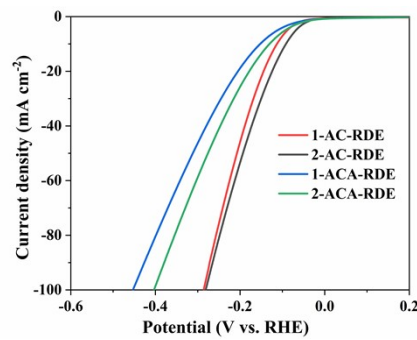

**Fig. S27** LSV curves of 1-AC-RDE, 2-AC-RDE, 1-ACA-RDE and 2-ACA-RDE.

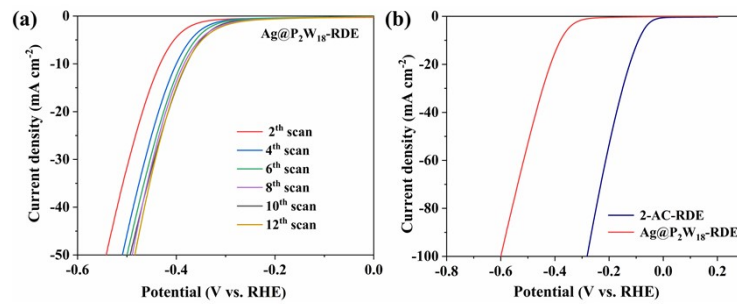

**Fig. S28** LSV curves of (a)  $\text{Ag}@P_2W_{18}$ -RDE and (b) different catalysts modified RDE in 0.5 M  $\text{H}_2\text{SO}_4$ , scan rate:  $5 \text{ mV s}^{-1}$ .

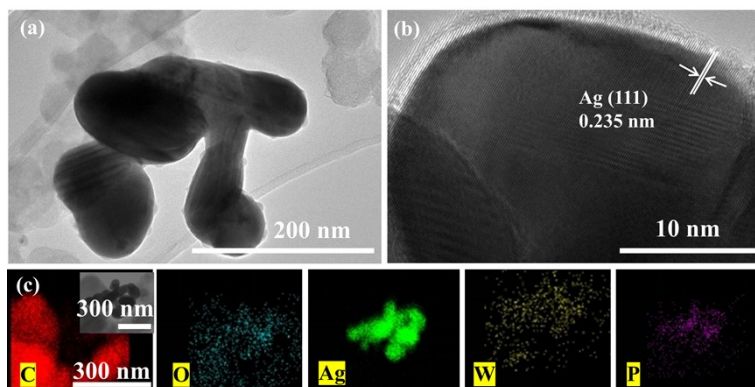

**Fig. S29** HR-TEM images of (a, b) Ag@P<sub>2</sub>W<sub>18</sub>-CP and elemental mappings of (c) C, O, Ag, W and P in Ag@P<sub>2</sub>W<sub>18</sub>-CP, respectively.

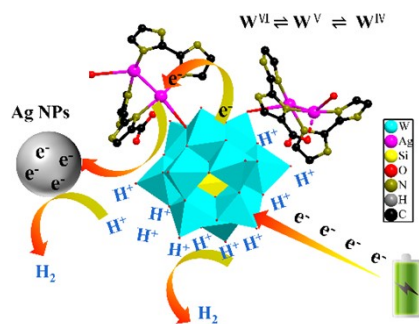

**Fig. S30** Possible electrochemical surface restructuring process for compound **1**.

## 8. References

- 1 H. H. Thorp, *Inorg. Chem.*, 2002, **31**, 1585–1588.
- 2 X. L. Wang, Y. Tian, Z. H. Chang and H. Lin, *ACS Sustain. Chem. Eng.*, 2020, **8**, 15696–15702.
- 3 B. Dong, J. Peng, P. Zhang, A. Tian, J. Chen and B. Xue, *Inorg. Chem. Commun.*, 2007, **10**, 839–842.
- 4 Y. Gong, Y. X. Yang, M. M. Zhang, X. L. Gao, J. L. Yin and J. H. Lin, *Dalton Trans.*, 2014, **43**, 16928–16936.
- 5 Y. Liang, S. Di, C. Wang, K. Yu, C. Wang, J. Lv and B. Zhou, *J. Energy Storage*, 2022, **56**, 105991.
- 6 Zhang, G. Wang, D. Chen, X. Lv and J. Li, *Chem. Mater.*, 2008, **20**, 6543–6549.
- 7 H. Yan, C. Tian, L. Wang, A. Wu, M. Meng, L. Zhao and Fu, H. *Angew Chem. Int. Ed.*, 2015, **54**, 6325–6329.
- 8 J. Du, Z. L. Lang, Y. Y. Ma, H. Q. Tan, B. L. Liu, Y. H. Wang, Z. H. Kang and Y. G. Li, *Chem. Sci.*, 2020, **11**, 3007–3015.
- 9 L. Li, C. Tang, Y. Zheng, B. Xia, X. Zhou, H. Xu and Qiao, S. Z. *Adv. Energy Mater.*, 2020, **10**, 2000789.
- 10 Y. Sun, L. Silvioli, N. R. Sahráie, W. Ju, J. Li, A. Zitolo, S. Li, A. Bagger, L. Arnarson, X. Wang, T. Moeller, D. Bernsmeier, J. Rossmeisl, F. Jaouen and P. Strasser, *J. Am. Chem. Soc.*, 2019, **141**, 12372–12381.
- 11 S. Cai, S. Shi, H. Li, Y. Bai and D. Dang, *Res. Chem. Intermed.*, 2018, **44**, 7769–7788.
- 12 A. Bar-Hen, S. Hettler, A. Ramasubramaniam, R. Arenal, R. Bar-Ziv and M. Bar. Sadan, *J. Energy Chem.*, 2022, **74**, 481–488.
- 13 M. Sadakane and E. Steckhan, *Chem. Rev.*, 1998, **98**, 219–238.
- 14 P. D. Prenzler, C. Boskovic, A. M. Bond and A. G. Wedd, *Anal. Chem.*, 1999, **71**, 3650–3656.
- 15 J. Sha, J. Peng, Y. Lan, Z. Su, H. Pang, A. Tian, P. Zhang and M. Zhu, *Inorg. Chem.*, 2008, **47**, 5145–5153.
- 16 X. Liu, L. Cui, K. Yu, J. Lv, Y. Liu, Y. Ma and B. Zhou, *Inorg. Chem.*, 2021, **60**, 14072–14082.
- 17 L. Cheng, X. Zhang, X. Xi, B. Liu and S. Dong, *J. Electroanal. Chem.*, 1996, **407**, 97–103.
- 18 J. S. Qin, D. Y. Du, W. Guan, X. J. Bo, Y. F. Li, L. P. Guo, Z. M. Su, Y. Y. Wang, Y. Q. Lan and H. C. Zhou, *J. Am. Chem. Soc.*, 2015, **137**, 7169–7177.
- 19 Y. Zheng and X. Xu, *ACS. Appl. Mater. Interfaces*, 2020, **12**, 53739–53748.
- 20 L. Zhang, S. Li, C. J. Gomez-Garcia, H. Ma, C. Zhang, H. Pang and B. Li, *ACS Appl Mater. Interfaces*, 2018, **10**, 31498–31504.
- 21 Q. Shen, C. Zhang, M. Wang, H. Pang, H. Ma, X. Wang, L. Tan, D. Chai, Y. Hou and B. Li, *Inorg. Chem. Commun.*, 2019, **99**, 64–69.
- 22 Y. X. Ding, Q. H. Zheng, M. T. Peng, C. Chen, K. F. Zou, B. X. Dong, W. L. Liu and Y. L. Teng, *Catal. Commun.*, 2021, **161**, 106367.
- 23 D. Zang, Y. Huang, Q. Li, Y. Tang and Y. Wei, *Appl. Catal. B: Environ.*, 2019, **249**, 163–171.
- 24 W. Ahmad, Q. Gao, X. L. Zhang, W. Tan, L. Zhang, M. R. Gao and S. H. Yu, *ChemNanoMat.*, 2020, **6**, 1164–1168.
- 25 S. Li, L. Zhang and Y. Lan, *Chem. Commun.*, 2018, **54**, 1964–1967.
- 26 P. Wang, H. Zhang, P. Wang, J. Zha, J. Gautam, H. Zhang, R. Li, L. N. Zhang, G. Diao and L. Ni, *Catal. Commun.*, 2022, **165**, 106446.
- 27 Y. C. Zhang, Y. Tian, Z. H. Chang, Q. Q. Liu, Y. Z. Chen, J. N. Wang and X. L. Wang, *Eur. J. Inorg. Chem.*, 2022, **2**, e202100725.
- 28 R. Liu, G. Zhang, H. Cao, S. Zhang, Y. Xie, A. Haider, U. Kortz, B. Chen, N. S. Dalal, Y. Zhao, L. Zhi, C.-X. Wu, L.-K. Yan, Z. Su and B. Keita, *Energy Environ. Sci.*, 2016, **9**, 1012–1023.
- 29 D. M. Fernandes, M. P. Araújo, A. Haider, A. S. Mougharbel, A. J. S. Fernandes, U. Kortz and C. Freire, *ChemElectroChem*, 2018, **5**, 273–283.
- 30 X. Xia, X. Shen, X. Zhao, W. Ye and C. Wang, *ChemCatChem*, 2015, **7**, 2517–2525.
- 31 J. F. Huang and Y. C. Wu, *ACS Sustain. Chem. Eng.*, 2018, **6**, 8285–8290.
- 32 J. Wang, W. Fang, Y. Hu, Y. Zhang, J. Dang, Y. Wu, H. Zhao and Z. Li, *Catal. Sci. Technol.*, 2020, **10**, 154–163.
- 33 W. Lu, X. Xia, X. Wei, M. Li, M. Zeng, J. Guo and S. Cheng, *ACS Appl. Mater. Interfaces*, 2020, **12**, 21569–21578.
- 34 M. Ghosal Chowdhury, L. Sahoo, S. Maity, D. Bain, U. K. Gautam and A. Patra, *ACS Appl. Nano Mater.*, 2022, **5**, 7132–7141.
- 35 Z. Li, J. Y. Fu, Y. Feng, C. K. Dong, H. Liu and X. W. Du, *Nat. Catal.*, 2019, **2**, 1107–1114.
- 36 D. Rodriguez-Padron, A. R. Puentes-Santiago, M. Cano, A. Caballero, M. J. Munoz-Batista and R. Luque, *ACS Appl. Mater. Interfaces*, 2020, **12**, 2207–2215.
- 37 X. Ji, B. Liu, X. Ren, X. Shi, A. M. Asiri and X. Sun, *ACS Sustain. Chem. Eng.*, 2018, **6**, 4499–4503.
- 38 J. Lu, J. Guo, S. Song, G. Yu, H. Liu, X. Yang and Z. Lu, *RSC Adv.*, 2020, **10**, 38583–38587.
