# Supplementary material for: Development of polyoxometalate-based Ag-H2biim inorganic–organic hybrid compounds functionalized for the acid electrocatalytic hydrogen evolution reaction
Source: Royal Society of Chemistry journal article supplement (doi:10.1039/d3dt02820h), 2023-01-01
Supplement: d3dt02820h2.pdf [file d3dt02820h2.pdf]

**Table S2** Selected bond lengths (Å) and bond angles (°) of compound **1**

| <b>Bond</b> | <b>Length(Å)</b> | <b>Bond</b> | <b>Length(Å)</b> | <b>Bond</b> | <b>Length(Å)</b> |
|-------------|------------------|-------------|------------------|-------------|------------------|
| Ag1–N5      | 2.143(14)        | N1–C3       | 1.35(2)          | N7–C7       | 1.34(2)          |
| Ag1–N1      | 2.118(14)        | N2–C2       | 1.351(19)        | N7–C10      | 1.347(19)        |
| Ag1–Ag2     | 2.852(3)         | N2–C5       | 1.40(2)          | N8–C12      | 1.33(2)          |
| Ag2–N2      | 2.115 (14)       | N3–C1       | 1.36(2)          | N8–C8       | 1.40(2)          |
| Ag2–N6      | 2.16(2)          | N3–C4       | 1.36(2)          | C1–C2       | 1.42(2)          |
| Ag2–O23     | 2.7863(3)        | N4–C2       | 1.35(2)          | C3–C4       | 1.33(2)          |
| Ag2–O3      | 2.623(2)         | N4–C6       | 1.34(2)          | C5–C6       | 1.32(2)          |
| Ag1–O10     | 2.636(2)         | N5–C7       | 1.326(19)        | C7–C8       | 1.42(2)          |
| O23–C13     | 1.231(19)        | N5–C9       | 1.36(2)          | C9–C10      | 1.33(2)          |
| O24–C13     | 1.217(17)        | N6–C11      | 1.369(18)        | C11–C13     | 1.36(2)          |
| N1–C1       | 1.35(2)          | N6–C8       | 1.30(2)          | C11–C12     | 1.35(2)          |
| <b>Bond</b> | <b>Angle(°)</b>  | <b>Bond</b> | <b>Angle(°)</b>  | <b>Bond</b> | <b>Angle(°)</b>  |
| N1–Ag1–N5   | 168.1(5)         | C8–N6–C11   | 105.2(14)        | C5–C6–N4    | 107.8(16)        |
| N1–Ag1–Ag2  | 81.7(4)          | C8–N6–Ag2   | 129.5(10)        | N5–C7–N7    | 109.9(14)        |
| N5–Ag1–Ag2  | 86.4(4)          | C11–N6–Ag2  | 124.6(11)        | N5–C7–C8    | 126.4(16)        |
| N2–Ag2–N6   | 167.9(5)         | C7–N7–C10   | 107.0(14)        | N7–C7–C8    | 123.7(15)        |
| N2–Ag2–Ag1  | 86.0(4)          | C12–N8–C8   | 106.5(15)        | N6–C8–N8    | 110.8(14)        |
| N6–Ag2–Ag1  | 84.2(3)          | N1–C1–N3    | 107.7(14)        | N6–C8–C7    | 127.7(15)        |
| C1–N1–C3    | 107.1(15)        | N1–C1–C2    | 126.9(16)        | N8–C8–C7    | 121.5(16)        |
| C1–N1–Ag1   | 127.1(11)        | N3–C1–C2    | 125.3(17)        | C10–C9–N5   | 108.6(15)        |
| C3–N1–Ag1   | 125.8(13)        | N4–C2–N2    | 108.5(15)        | C9–C10–N7   | 108.1(16)        |
| C2–N2–C5    | 105.4(13)        | N4–C2–C1    | 126.1(15)        | C12–C11–C13 | 127.1(15)        |
| C2–N2–Ag2   | 125.0(11)        | N2–C2–C1    | 125.4(15)        | C12–C11–N6  | 110.6(15)        |
| C5–N2–Ag2   | 129.6(10)        | C4–C3–N1    | 110.1(18)        | C13–C11–N6  | 122.1(16)        |
| C1–N3–C4    | 108.0(16)        | C3–C4–N3    | 107.1(17)        | N8–C12–C11  | 106.9(15)        |
| C6–N4–C2    | 109.2(14)        | C6–C5–N2    | 109.1(15)        | O24–C13–O23 | 120.7(17)        |
| C7–N5–C9    | 106.4(14)        | O3–Ag2–Ag1  | 149.5(10)        | O24–C13–C11 | 120.3(17)        |
| C7–N5–Ag1   | 128.4(11)        | O23–Ag2–O3  | 74.9(9)          | O23–C13–C11 | 118.8(15)        |
| C9–N5–Ag1   | 125.1(11)        | C13–O23–Ag2 | 108.3(10)        |             |                  |

Symmetry transformations used to generate equivalent atoms: #1  $-x+1, -y+1, -z+1$
