# Supplementary material for: Development of polyoxometalate-based Ag-H2biim inorganic–organic hybrid compounds functionalized for the acid electrocatalytic hydrogen evolution reaction
Source: Royal Society of Chemistry journal article supplement (doi:10.1039/d3dt02820h), 2023-01-01
Supplement: d3dt02820h3.pdf [file d3dt02820h3.pdf]

**Table S6** FTIR peak assignments of compounds **1** and **2**

| Compound 1          |                     | Compound 2          |                     |
|---------------------|---------------------|---------------------|---------------------|
| 802                 | W-O <sub>c</sub> -W | 801                 | W-O <sub>c</sub> -W |
| 923                 | W-O <sub>b</sub> -W | 901                 | W-O <sub>b</sub> -W |
| 972                 | Si-O <sub>c</sub>   | 950                 | W-O <sub>d</sub>    |
| 1018                | W-O <sub>d</sub>    | 1088                | P-O <sub>c</sub>    |
| 1114/1244/1377/1622 | C-N/C=N             | 1222/1292/1336/1620 | C-N/C=N             |
| 1514/1544           | C=C                 | 1418/1536           | C=C                 |
| 1714                | C=O                 | 3138                | N-H                 |
| 3139                | N-H                 | 3244                | C-H                 |
| 3565                | O-H                 | 3455                | O-H                 |
